# Supplementary material for: An International Laboratory for Systems and Computational Neuroscience
Source: PubMed Central journal article supplement (PMC5752703; doi:10.1016/j.neuron.2017.12.013), 2017-12-20
Supplement: mmc1.pdf [file mmc1.pdf]

**Neuron, Volume 96**

**Supplemental Information**

**An International Laboratory for Systems  
and Computational Neuroscience**

**The International Brain Laboratory**

Author affiliations:

Larry F. Abbott, Columbia University  
Dora E. Angelaki, Baylor College of Medicine  
Matteo Carandini, University College, London  
Anne K. Churchland, Cold Spring Harbor Laboratory  
Yang Dan, Howard Hughes Medical Institute, University of California, Berkeley  
Peter Dayan, University College, London  
Sophie Deneve, École Normal Supérieure  
Ila Fiete, University of Texas at Austin  
Surya Ganguli, Stanford University  
Kenneth D. Harris, University College, London  
Michael Hausser, University College, London  
Sonja Hofer, Sainsbury Wellcome Centre for Neural Circuits and Behaviour, Univ. College London  
Peter E. Latham, University College, London  
Zachary F. Mainen, Champalimaud Research  
Thomas Mrsic-Flogel, Sainsbury Wellcome Centre for Neural Circuits and Behaviour, Univ. College London  
Liam Paninski, Center for Theoretical Neuroscience, Columbia University  
Jonathan W. Pillow, Princeton University  
Alexandre Pouget, University of Geneva  
Karel Svoboda, Janelia Research Campus  
Ilana B. Witten, Princeton University  
Anthony M. Zador, Cold Spring Harbor Laboratory
